# Supplementary material for: Shallow WGS of individual CTCs identifies actionable targets for informing treatment decisions in metastatic breast cancer
Source: PubMed Central journal article supplement (PMC9643413; doi:10.1038/s41416-022-01962-9), 2022-09-10
Supplement: 41416_2022_1962_MOESM1_ESM.pdf [file 41416_2022_1962_MOESM1_ESM.pdf]

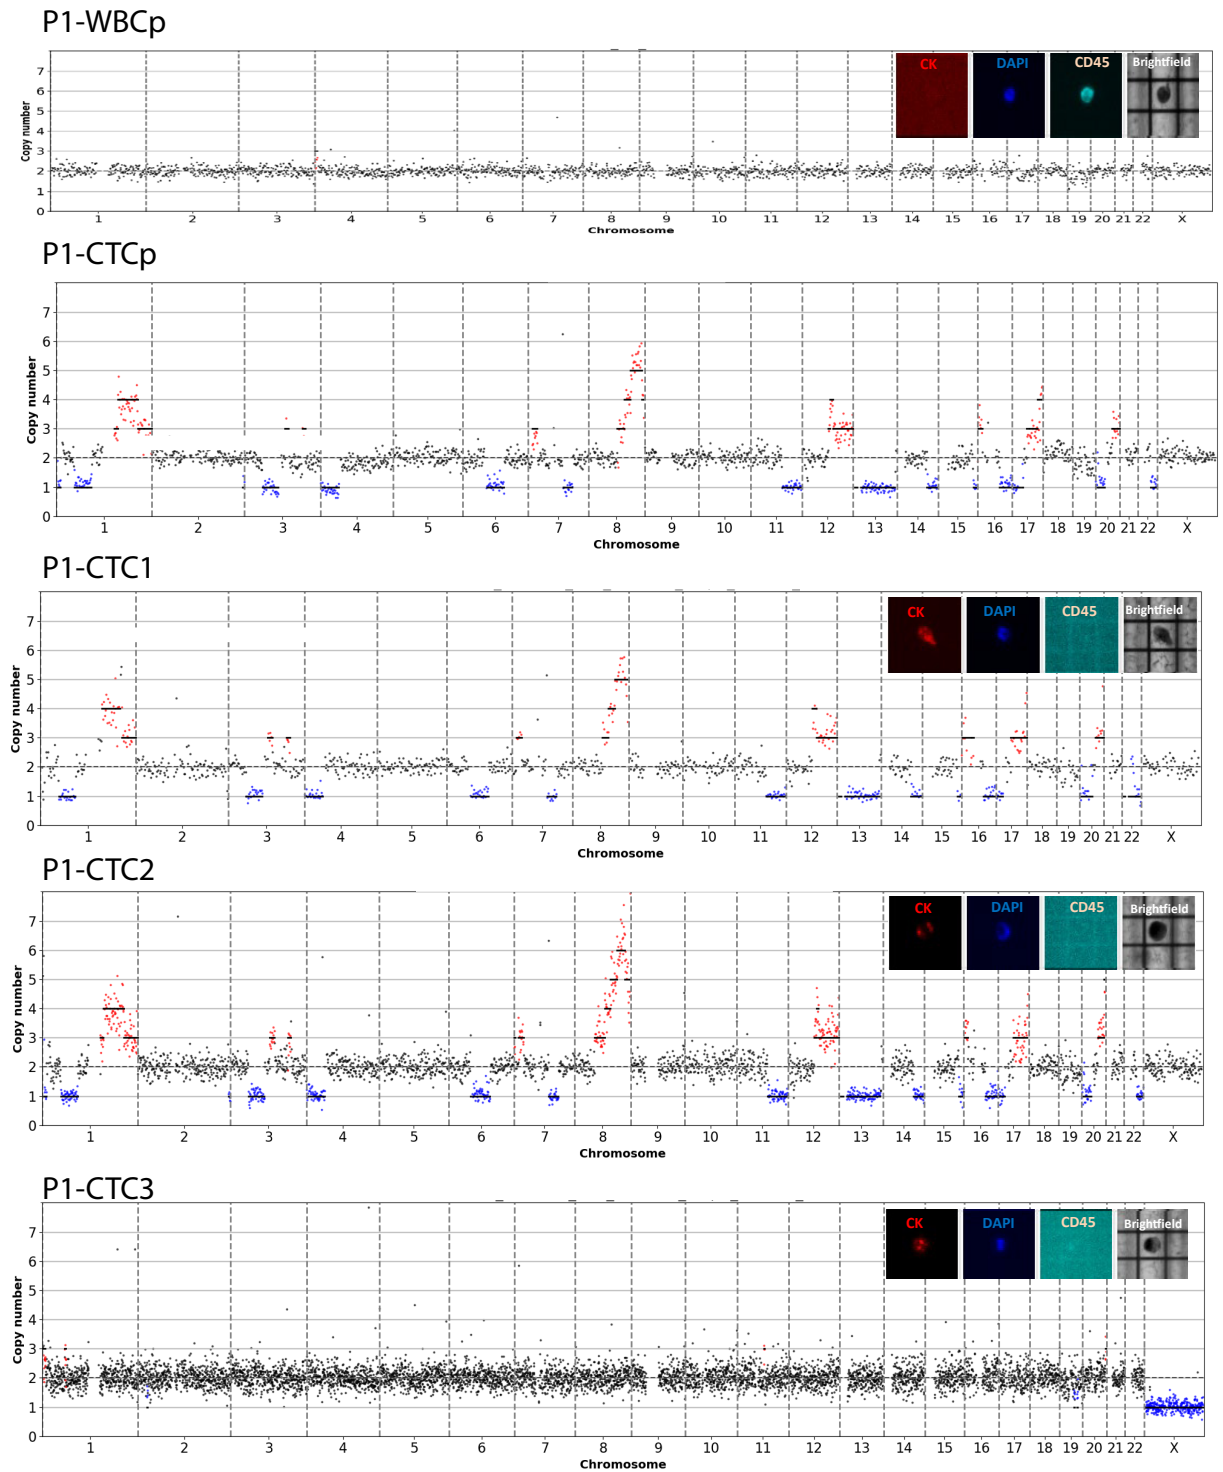

**Supplementary Figure 1.** Patient 1 CTC Genome wide profiles were generated using MSBiosuite. P1-WBCp (white blood cell pool) shows a normal profile with no genomic aberrations. DEArray™ images from two of the single WBCs included in this pool P1-CTCp (CTC pool) shows a genome wide profile comparable to CTC 1 and CTC 2, with very little heterogeneity. However even though by DEArray CTC 3 is suggested to be a CTC the genomic profile is flat showing only loss of chromosome X.
